# Supplementary material for: Building a Relevant Biomedical Graduate Program: From Review to Reform
Source: Research Square preprint supplement (doi:10.21203/rs.3.rs-8050744/v1), 2025-12-01

**Supplementary File 1:** Student survey questions


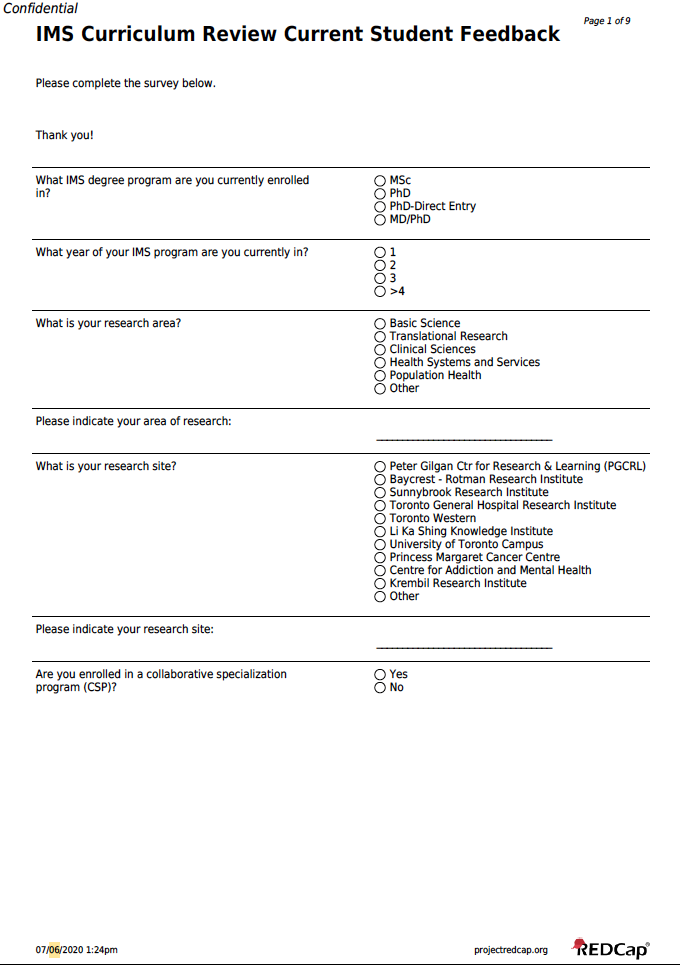


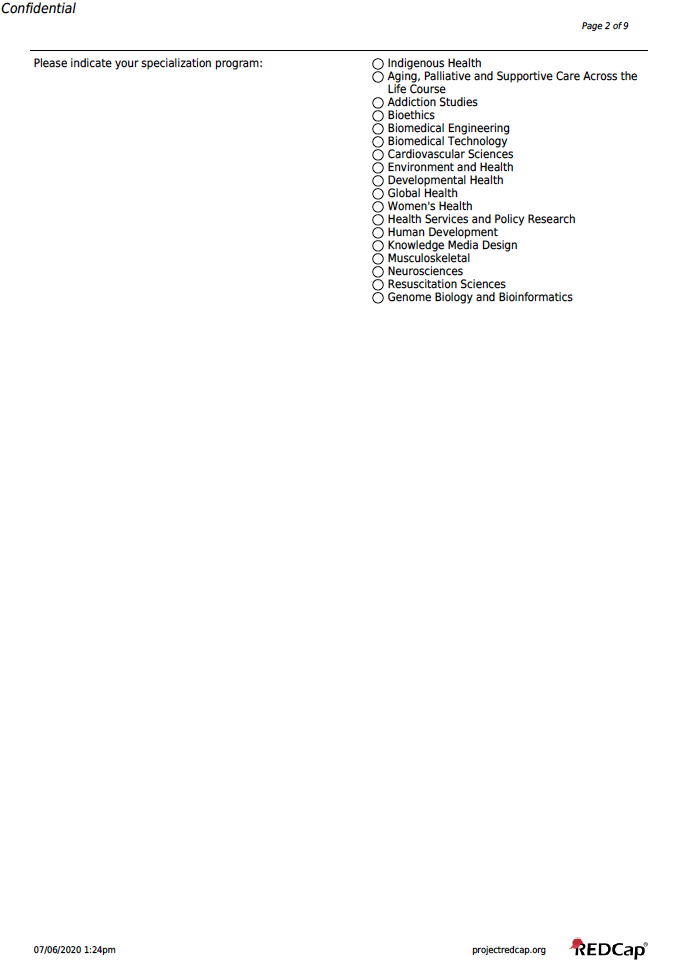


**
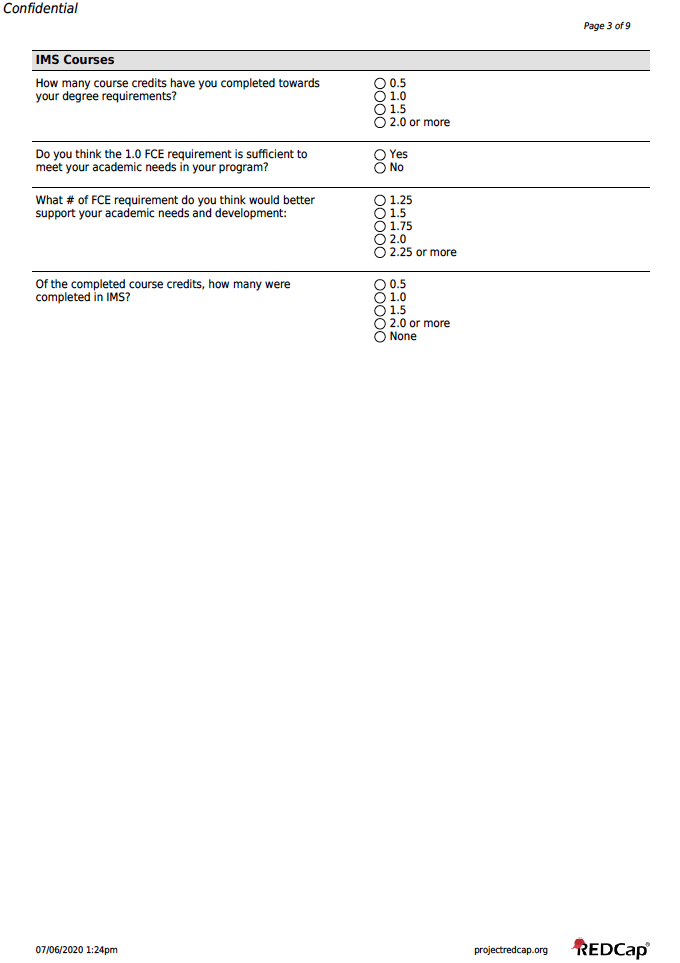
** **
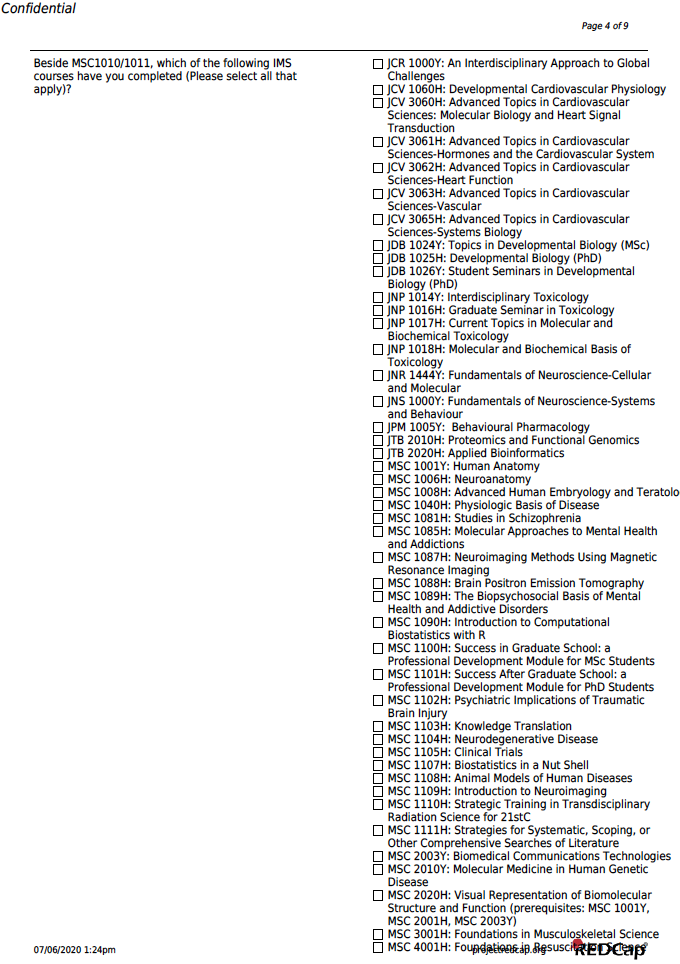
**

**
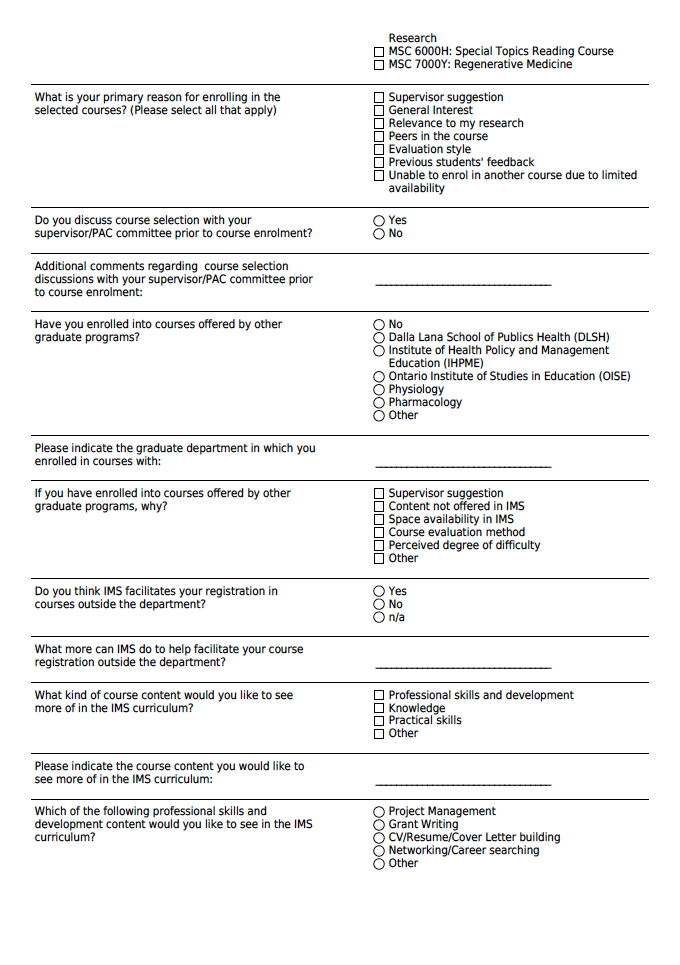
** **
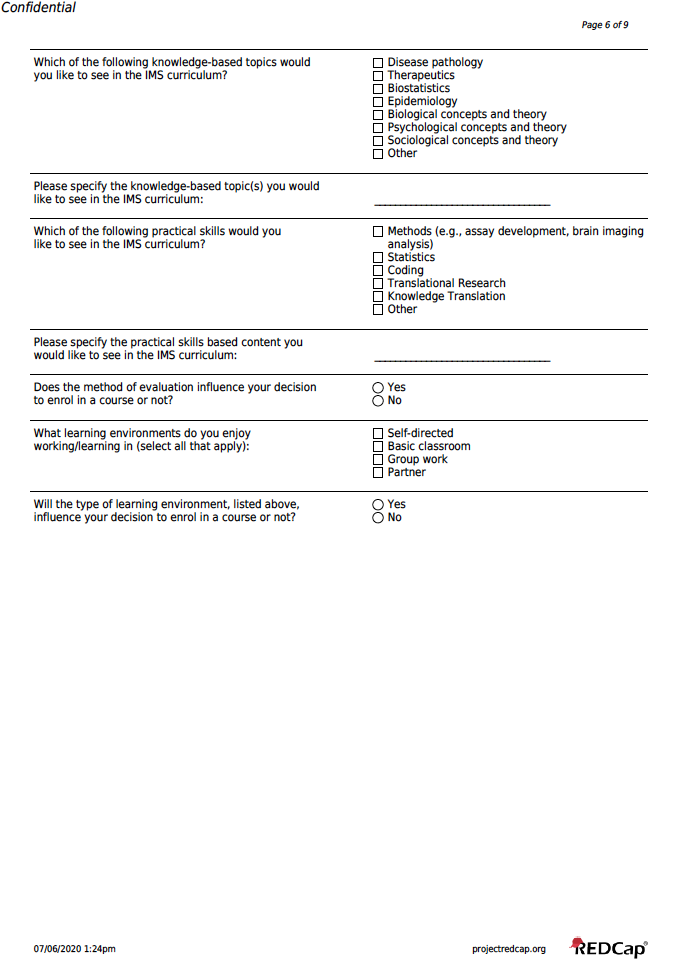
**
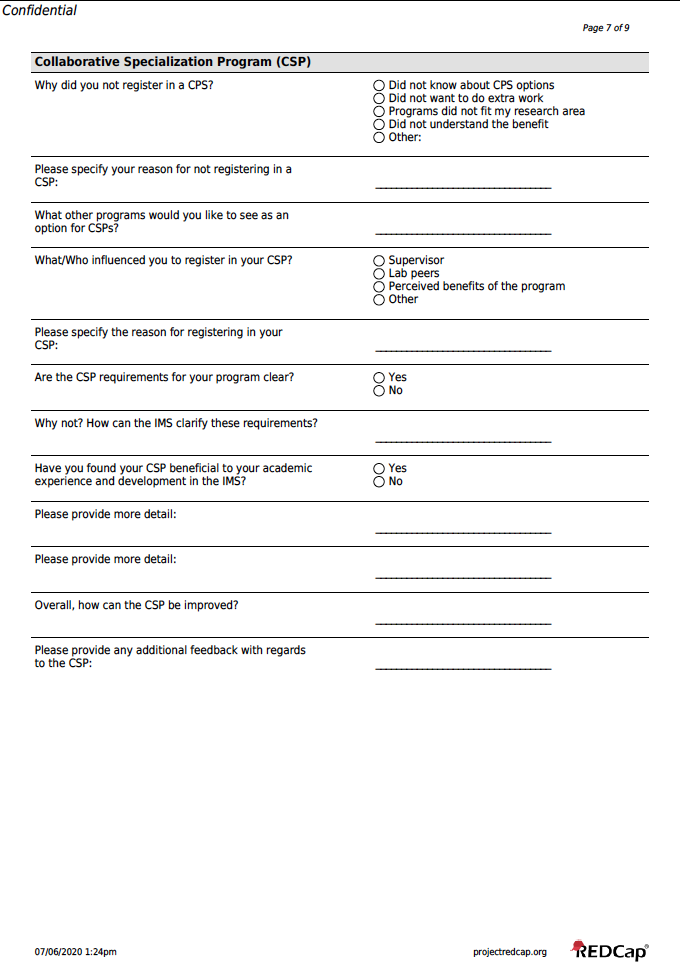

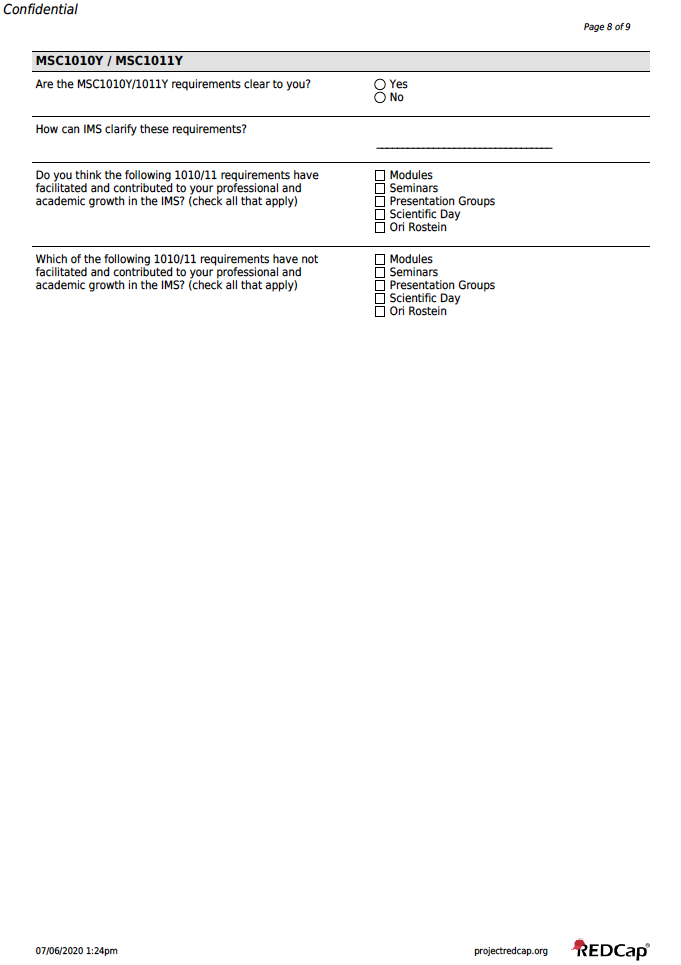

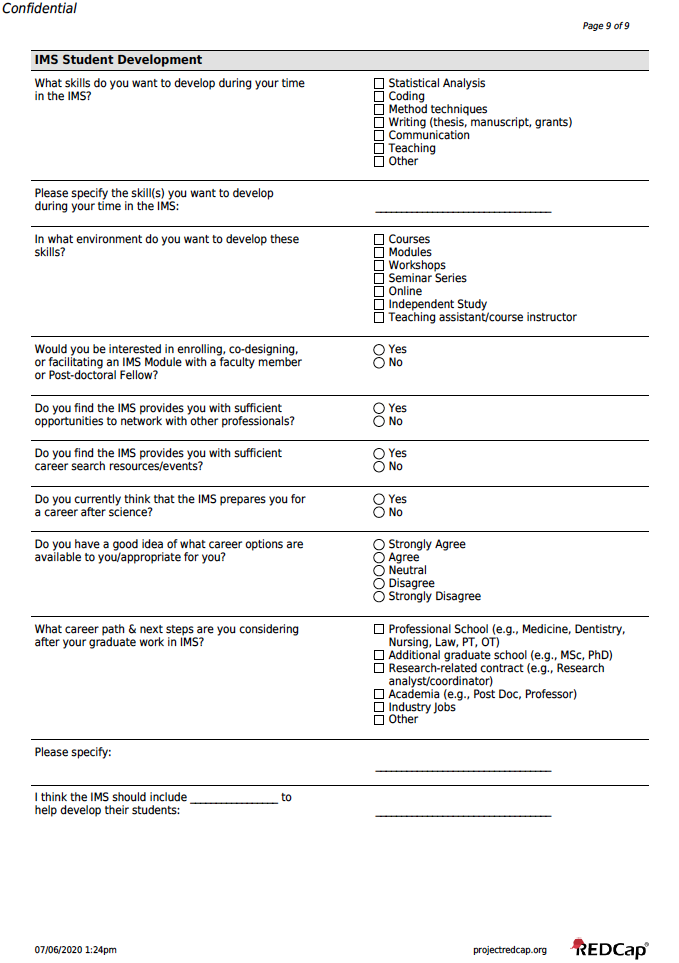


**Supplementary File 2:** Alumni survey questions


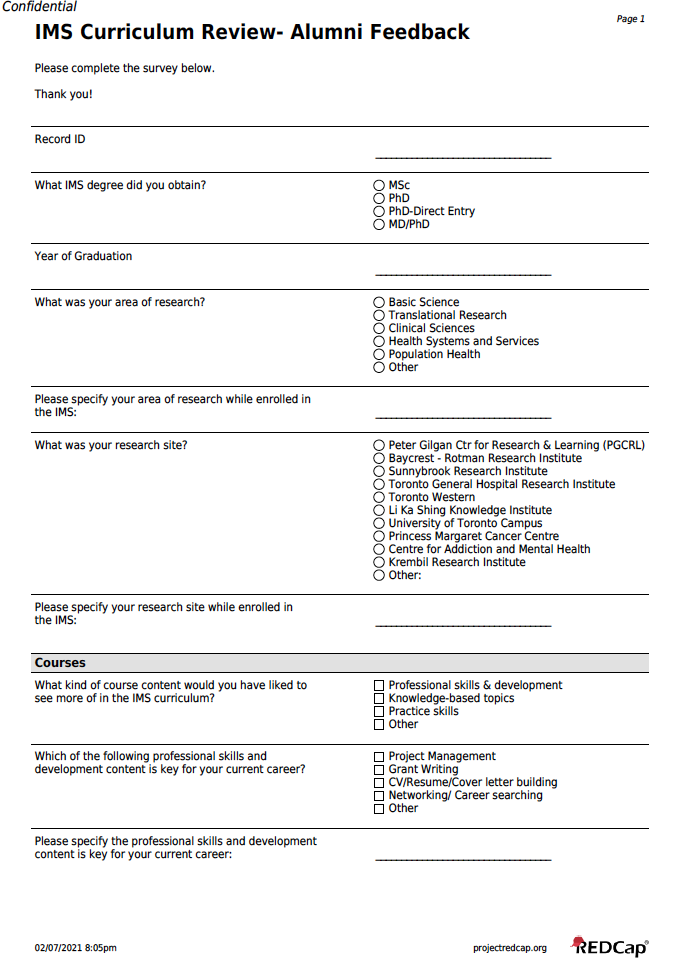


**
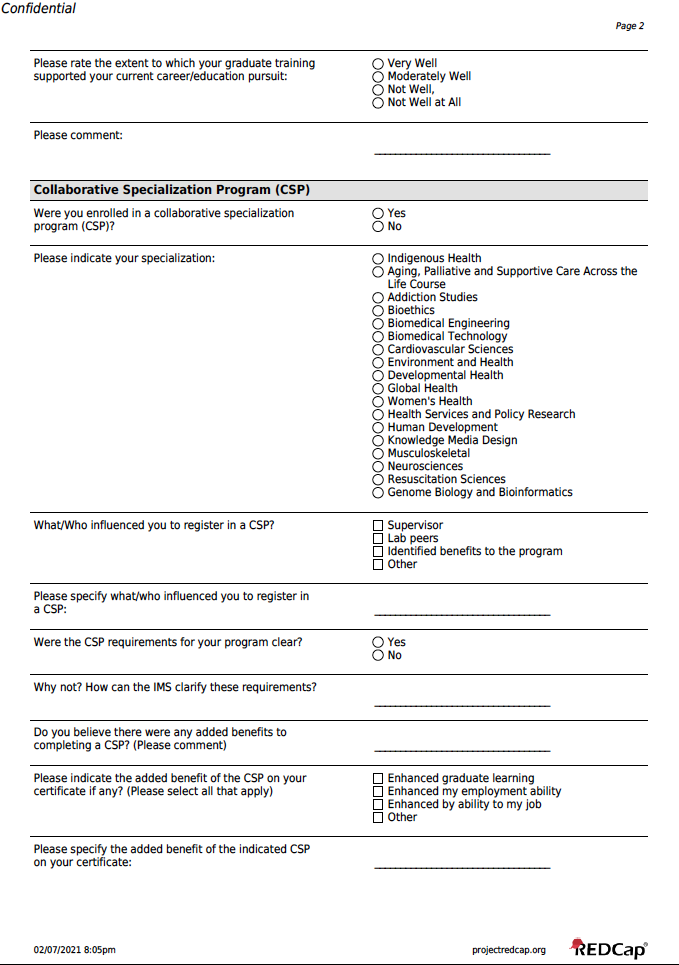
** **
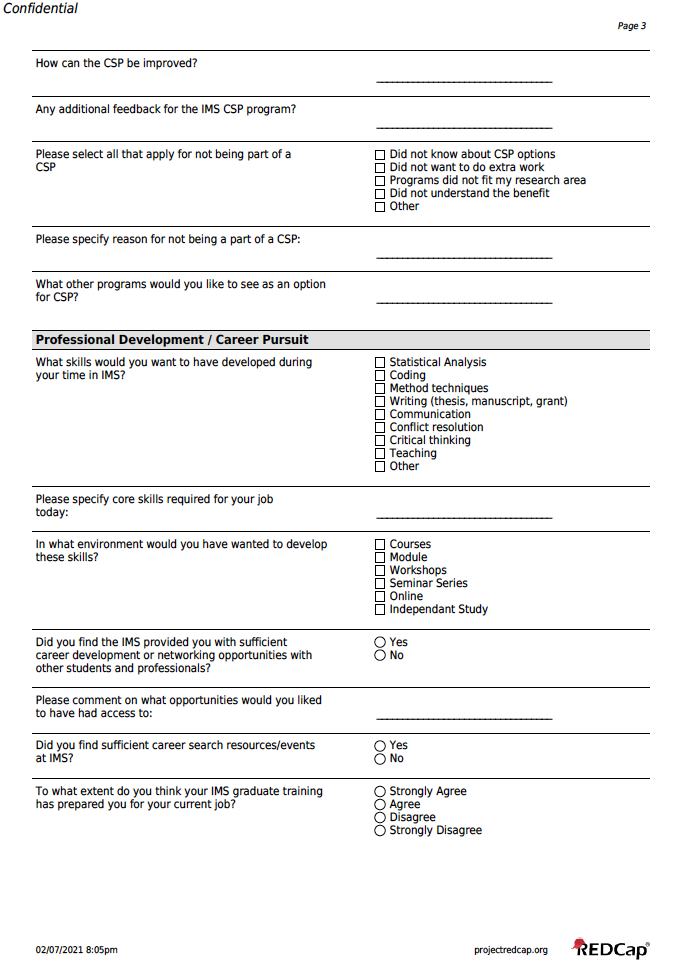
**
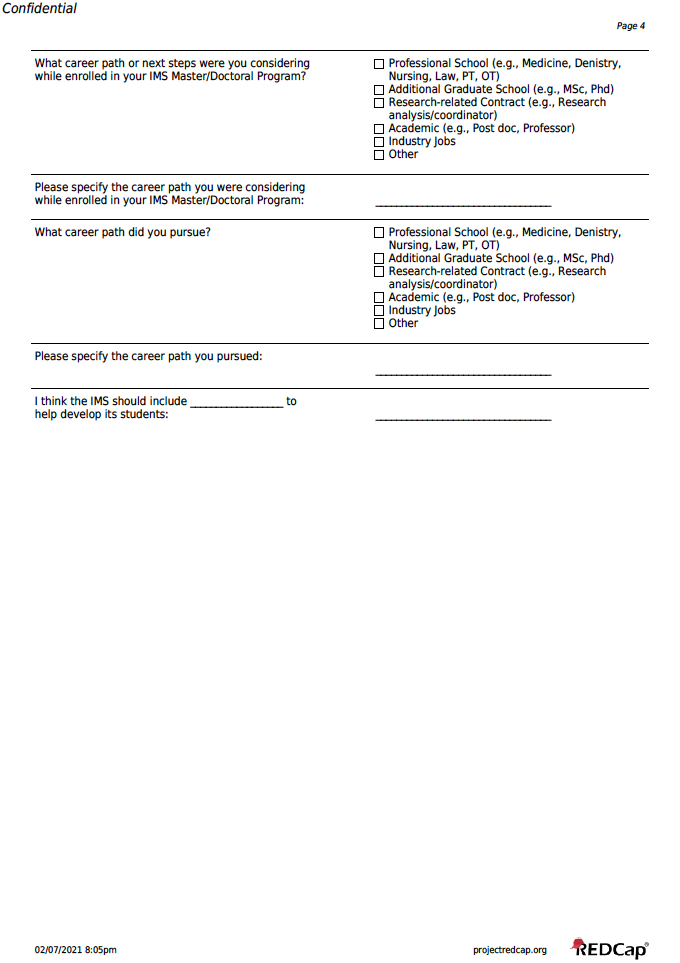


**Supplementary File 3:** Faculty/supervisor survey questions

**
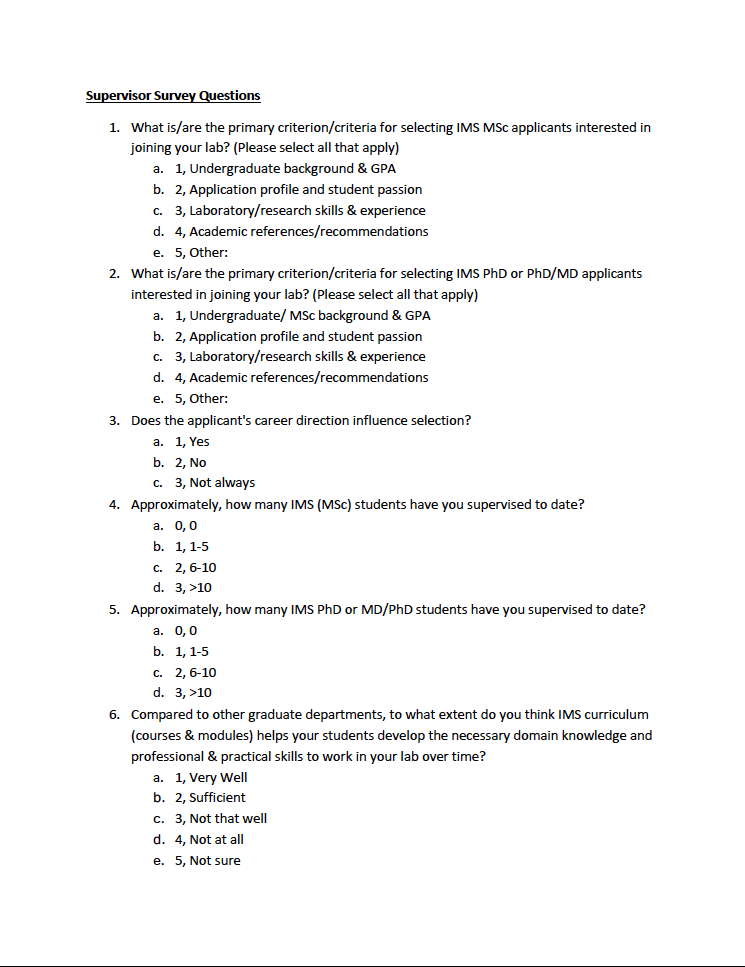
**

**
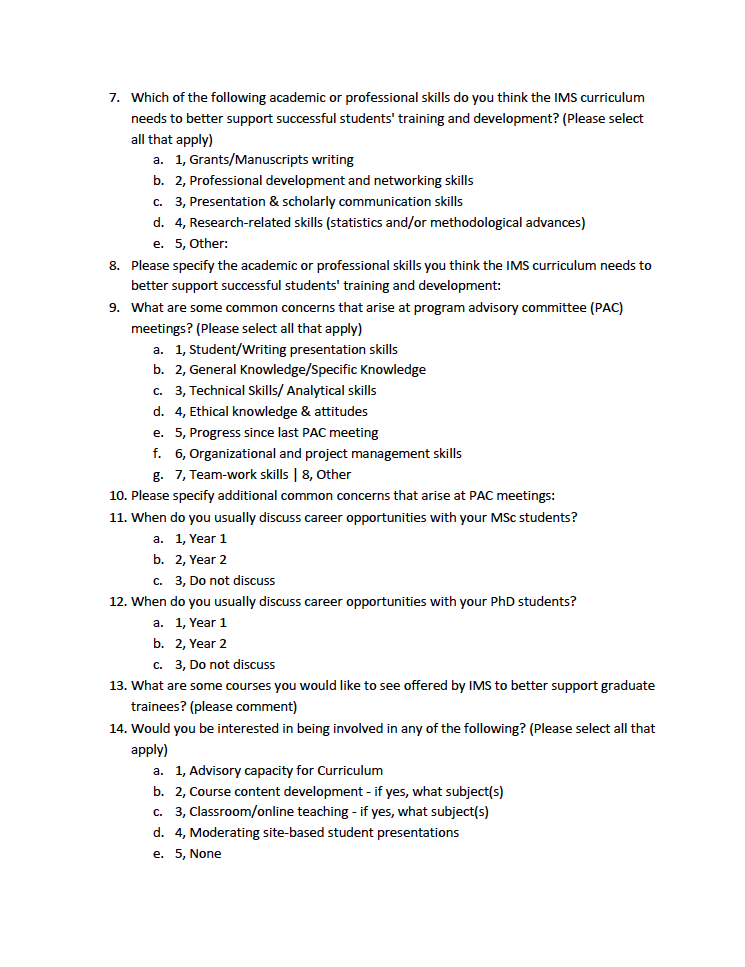
**
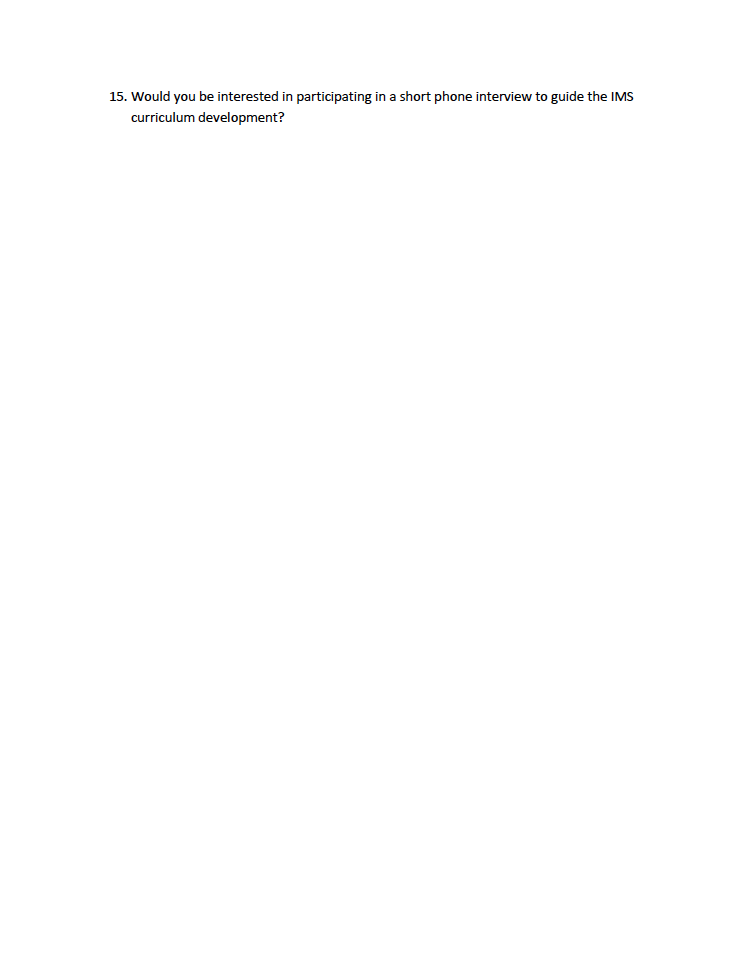


**Supplementary File 4:** Faculty/supervisor interview guide questions


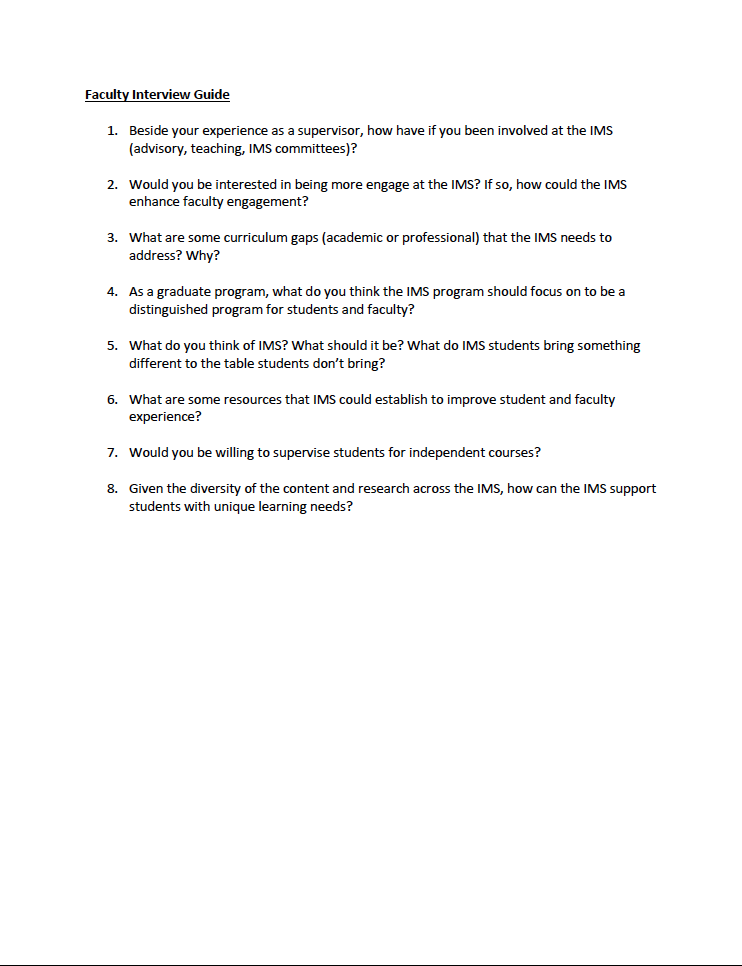


**Supplementary File 5:** Student focus group questions


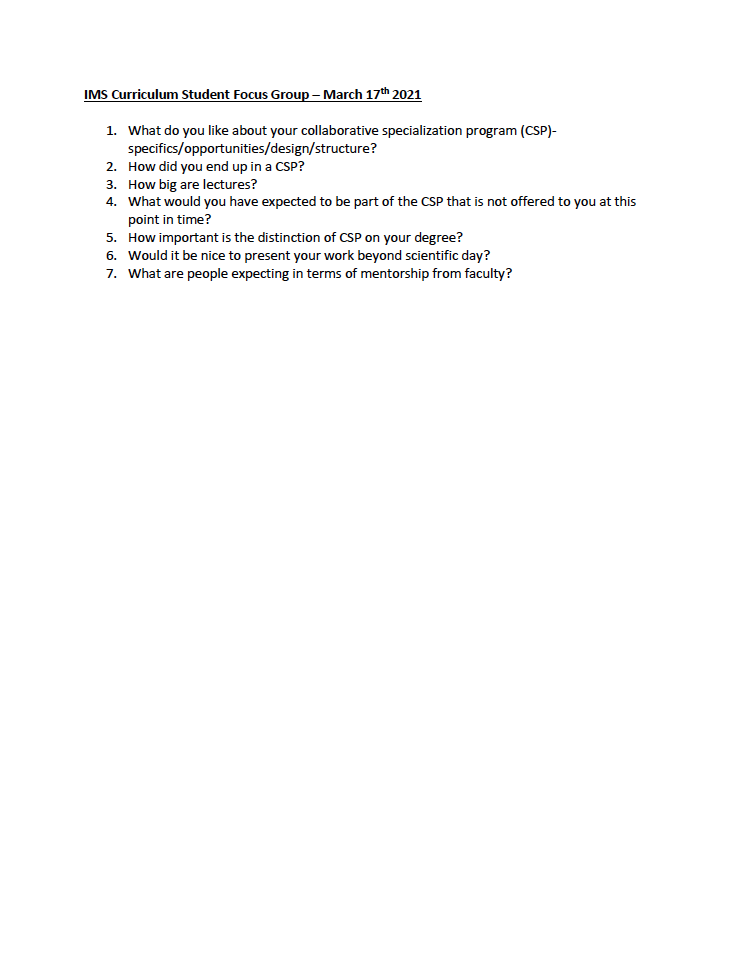

Supplement: Supplementary file 1 [file 3cd77d1debed2d0108f3a5ad.docx]
